# Supplementary material for: A series of tunable emission phosphors of Sm3+, Eu3+ and Mn2+ doped Ba3Tb(PO4)3: luminescence and energy transfer
Source: Royal Society of Chemistry journal article supplement (doi:10.1039/c5ra12619c), 2015-01-01
Supplement: c5ra12619c1.pdf [file c5ra12619c1.pdf]

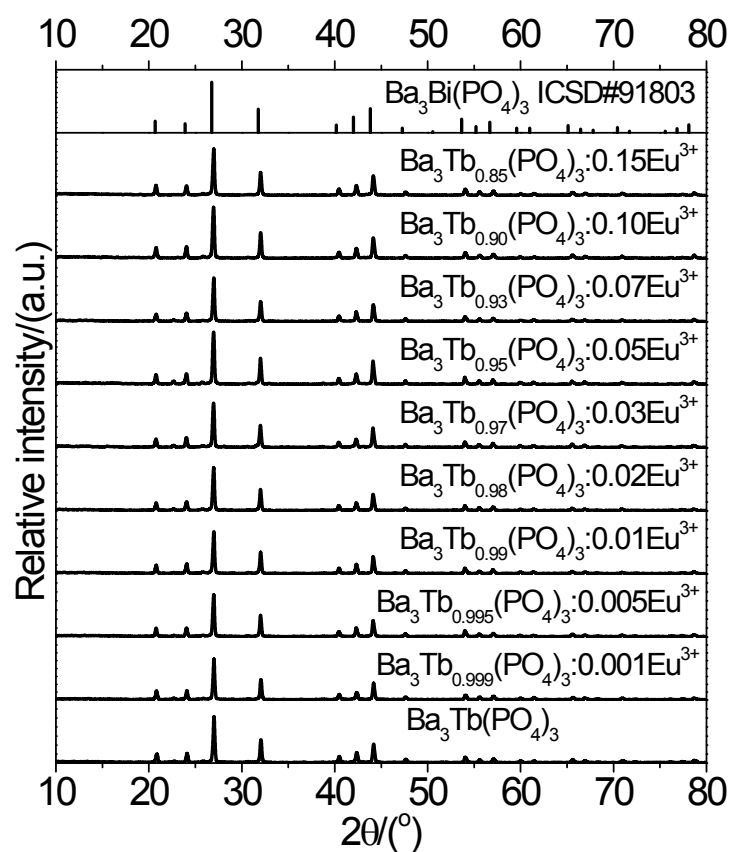

Figure S1. XRD patterns of  $\text{Ba}_3\text{Tb}_{1-y}(\text{PO}_4)_3:y\text{Eu}^{3+}$  ( $y=0-0.15$ ).

Standard data of  $\text{Ba}_3\text{Bi}(\text{PO}_4)_3$  (ICSD No. 91803) is shown as reference.

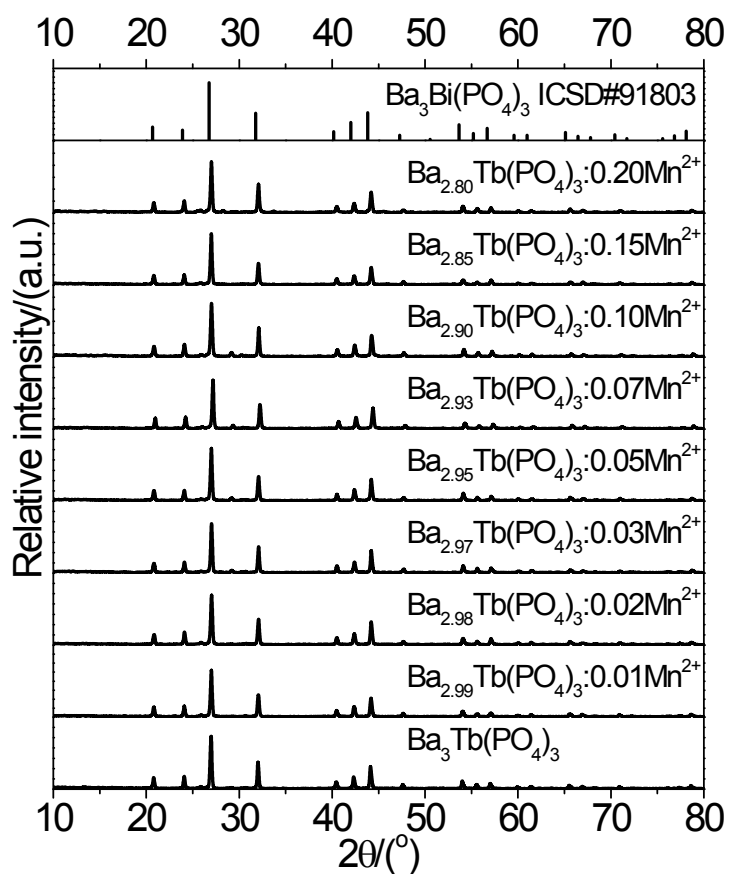

Figure S2. XRD patterns of  $\text{Ba}_{3-z}\text{Tb}(\text{PO}_4)_3:z\text{Mn}^{2+}$  ( $z=0-0.20$ ).

Standard data of  $\text{Ba}_3\text{Bi}(\text{PO}_4)_3$  (ICSD No. 91803) is shown as reference.

Table S1 Lifetimes of  $\text{Ba}_3\text{Tb}(\text{PO}_4)_3:x\text{Sm}^{3+}$ ,  $\text{Ba}_3\text{Tb}(\text{PO}_4)_3:y\text{Eu}^{3+}$ ,  $\text{Ba}_3\text{Tb}(\text{PO}_4)_3:z\text{Mn}^{2+}$  ( $\lambda_{\text{ex}}=377$  nm)

| Samples                               | $\tau$ (ms) | Samples  | $\tau$ (ms) |
|---------------------------------------|-------------|----------|-------------|
| $\text{Ba}_3\text{Tb}(\text{PO}_4)_3$ | 2.864       | $y=0.05$ | 1.208       |
| $x=0.001$                             | 2.798       | $y=0.07$ | 1.032       |
| $x=0.005$                             | 1.919       | $y=0.10$ | 0.912       |
| $x=0.01$                              | 0.379       | $z=0.01$ | 2.110       |
| $x=0.02$                              | 0.155       | $z=0.02$ | 0.430       |
| $x=0.03$                              | 0.115       | $z=0.03$ | 0.179       |
| $x=0.05$                              | 0.067       | $z=0.05$ | 0.078       |
| $x=0.07$                              | 0.065       | $z=0.07$ | 0.067       |
| $x=0.10$                              | 0.057       | $z=0.10$ | 0.063       |
| $x=0.15$                              | 0.054       | $z=0.07$ | 0.060       |
| $y=0.01$                              | 2.571       | $z=0.15$ | 0.011       |
| $y=0.03$                              | 1.621       | $z=0.20$ | 0.010       |
